# Supplementary material for: Synergistic combination of the nanoporous system of MOF-808 with a polyoxomolybdate to design an effective catalyst: simultaneous oxidative desulfurization and denitrogenation processes
Source: Royal Society of Chemistry journal article supplement (doi:10.1039/d1se00522g), 2021-01-01
Supplement: d1se00522g1.pdf [file d1se00522g1.pdf]

## SUPPORTING INFORMATION

Synergistic combination of the nanoporous system of  
MOF-808 with polyoxomolybdate to design an  
effective catalyst: simultaneous oxidative  
desulfurization and denitrogenation processes

Simone C. Fernandes, Alexandre M. Viana, Baltazar de Castro,

Luís Cunha-Silva\* and Salette S. Balula\*

*LAQV / REQUIMTE & Department of Chemistry and Biochemistry,*

*Faculty of Sciences, University of Porto, 4169-007 Porto, Portugal.*

\* E-mail: l.cunha.silva@fc.up.pt; sbalula@fc.up.pt

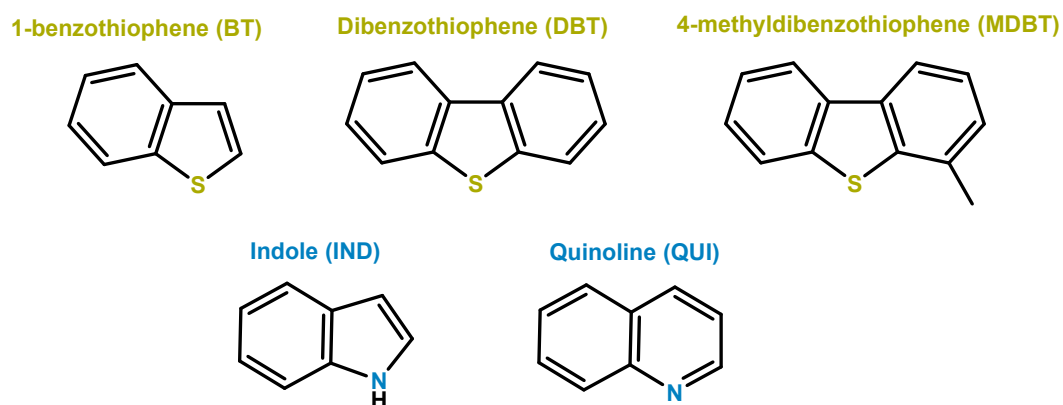

**Figure S1.** Chemical structures of the refractory sulfur- and nitrogen-compounds used in the preparation of the multicomponent model Fuel investigated.
